# Supplementary material
Source: publisher figshare collection journal article supplement (https://acs.figshare.com/ndownloader/files/5686419)
Supplement: Supplementary file 1 [file 5686419]

## SUPPLEMENTARY MATERIAL

### Compounds Manufactured in Combustion

Except for molybdenum, any compounds of the 17 listed metals in Table 1 (main text) that are manufactured in amounts totaling more than 25,000 lb/yr are reportable to the Toxics Release Inventory (TRI). In addition, specific forms of aluminum, molybdenum and vanadium also are listed. These are the fibrous (man-made) form of aluminum oxide, aluminum dust or fume, vanadium dust or fume, and molybdenum trioxide. Since aluminum and vanadium are converted during combustion to natural oxides rather than elemental metal, these two substances are not reportable for power plants. Though chemical forms of molybdenum in power plant wastes are not routinely measured, experience in the molybdenum industry indicates that  $\text{MoO}_3$  is the principal compound formed at typical combustion temperatures in an oxidizing atmosphere (25). Although other compounds involving Mo in coal combustion cannot be ruled out, a conservative assumption is that all Mo converts to molybdenum trioxide, and would therefore be reportable if the threshold is exceeded.

As noted in the text, EPA has stated that in the absence of better site-specific information, other metals that take part in the combustion process may be assumed to convert completely into the lowest weight metal oxide per unit of the metal possible for each metal. Table S1 lists the lowest weight oxides per unit of metal for TRI metals (26). The last column gives the TRI threshold release in terms of equivalent elemental emissions, which is the quantity reportable for chemical categories. If the total quantity oxidized (or otherwise converted) at a given facility exceeds this amount, then *all* releases of that substance at the facility must be reported, whether

“manufactured” or not. However, trace chemicals in power plant air and water intake streams are excluded from TRI reporting.

### **Formation of Acid Aerosols**

HCl and HF are formed from chlorides and fluorides in fuel and emitted in gaseous form. Sulfuric acid is formed in the flue gas stream from the reaction of sulfur trioxide and water vapor. At typical flue gas temperatures (below 200 C), SO<sub>3</sub> is converted completely to H<sub>2</sub>SO<sub>4</sub> (although flue gas concentrations are typically reported as SO<sub>3</sub>). Sulfuric acid mist or condensation (i.e., a true aerosol) can be expected whenever the flue gas temperature falls below the acid dewpoint, which is a function of the SO<sub>3</sub> and H<sub>2</sub>O content of the flue gas. Dewpoint temperatures for coal plants typically are in the range of 127-149°C (27). For stack gas exit temperatures above the acid dewpoint, H<sub>2</sub>SO<sub>4</sub> exists in gaseous form (28, 29). Releases of H<sub>2</sub>SO<sub>4</sub> thus occur in aerosol or gaseous form, depending upon the dewpoint temperature. However, as noted in the text, the TRI defines an aerosol to include gases and vapors. Thus, all gaseous HCl and H<sub>2</sub>SO<sub>4</sub> emissions are reportable TRI releases for power plants if thresholds are exceeded.

### **Trace Element Removal Efficiency**

Table S2 summarizes the removal efficiency data used to partition total releases between air and land. Stack gas data indicate that 99.3% of the chlorides and 98.6% of the fluorides are in the gaseous phase.

### **Trace Element Variability in Coal**

Table S3 shows the range of total annual release values for the 650 MW case study plant based on a 90% probability interval for coal properties. This interval is defined by the 5th and

95th percentile values for coal trace species concentration, as illustrated in Figure 2 (main text) for chromium. The ranges in Table S3 (based on the PISCES Model database) provide the basis for the intervals shown in Figure 3 of the text. These data are for bituminous coals used for power generation. For any particular coal seam or coal supply, a much smaller variation can be expected than the ranges for all bituminous coals shown in Table S3.

### **Reportable TRI Compounds**

Table 4 (main text) showed that HCl, H<sub>2</sub>SO<sub>4</sub> and barium compounds are likely to always be reportable at plants burning bituminous coal, based on the median trace element concentrations shown in Table 2. On the other hand, releases of mercury and silver compounds are well below current reportable levels for all U.S. plants (e.g., the 650 MW case study plant had total Hg releases of 350 lb/yr). Releases of combustion-generated organic compounds also are well below current reporting thresholds, ranging from zero to several hundred pounds for the case study plant.

Because a number of chemical compounds that are not currently reportable to the TRI are of environmental concern, EPA recently proposed lowering the TRI reporting threshold to 10 lbs/yr for a number of substances including mercury and several organic compounds (30). Dioxins also would be added to the list of TRI chemicals at a reporting threshold of 0.1 gram. These proposed thresholds would take effect beginning in 2000. At the proposed new threshold, mercury would become reportable for most coal-fired plants.

### **National Estimates**

Table S4 summarizes the range of estimated TRI emissions from all coal-fired plants in 1995, based on a site-specific analysis of reported coal use and quality. Details are reported in Ref. (21).

### **Additional Literature Cited**

25. W. Kennelly, Climax Molybdenum Corp., Ypsilanti, MI, personal communication, 1997.
26. *Handbook of Chemistry and Physics*; The Chemical Rubber Co.: Cleveland, OH, 1997; 78th Edition.
27. Pierce, R.R., "Estimating Acid Dewpoints in Stack Gases," *Chemical Engineering*, April 11, 1977; p. 125-128.
28. Lodge, J.P., Ed., *Methods of Air Sampling and Analysis*; Lewis Publishers, 1989; 3rd Edition, p. 523.
29. Krigmont, H., "Flue Gas Conditioning," in *Applied Electrostatic Precipitation*; Parker, K.R., Ed.; Blackie Academic and Professional, 1997; p. 437.
30. *Federal Register*, 40 CFR Part 372, 64 (2), January 5, 1999; p. 687.

**Table S1.** Elemental Threshold Release Values for TRI Metal Compounds Manufactured During Combustion

| Metal      | Lowest Weight Oxide per Unit of Metal | Ratio <sup>a</sup> | Adjusted Threshold <sup>b</sup> (lbs/yr) |
|------------|---------------------------------------|--------------------|------------------------------------------|
| Antimony   | Sb <sub>2</sub> O <sub>3</sub>        | 1.200              | 20,833                                   |
| Arsenic    | As <sub>2</sub> O <sub>3</sub>        | 1.320              | 18,939                                   |
| Barium     | BaO                                   | 1.117              | 22,391                                   |
| Beryllium  | BeO                                   | 2.775              | 9,009                                    |
| Cadmium    | CdO                                   | 1.142              | 21,891                                   |
| Chromium   | CrO                                   | 1.308              | 19,113                                   |
| Cobalt     | CoO                                   | 1.271              | 19,670                                   |
| Copper     | Cu <sub>2</sub> O                     | 1.126              | 22,202                                   |
| Lead       | PbO                                   | 1.077              | 23,213                                   |
| Manganese  | MnO                                   | 1.291              | 19,365                                   |
| Mercury    | Hg <sub>2</sub> O                     | 1.040              | 25,000 <sup>c</sup>                      |
| Molybdenum | MoO <sub>3</sub> <sup>d</sup>         | 1.500              | 16,663 <sup>d</sup>                      |
| Nickel     | NiO                                   | 1.273              | 19,645                                   |
| Selenium   | SeO <sub>2</sub>                      | 1.405              | 17,790                                   |
| Silver     | Ag <sub>2</sub> O                     | 1.074              | 23,273                                   |
| Thallium   | Tl <sub>2</sub> O                     | 1.039              | 24,058                                   |
| Zinc       | ZnO                                   | 1.245              | 20,080                                   |

<sup>a</sup>Ratio of molecular weight of oxide to weight of metal in that compound.

<sup>b</sup>Equal to 25,000 lbs/yr divided by the ratio in the previous column.

This is the threshold quantity of the metals. Only the amount of elemental metal is reported, except for Mo where the amount of MoO<sub>3</sub> is reported.

<sup>c</sup>The EPA rule states that the threshold in this case can be increased to 25,000 lbs/yr since mercury is believed to be manufactured primarily in elemental form.

<sup>d</sup>Only molybdenum trioxide is a listed TRI chemical.

**Table S2. Trace Element Removed Efficiency  
for Case Study Plant**

| Trace<br>Element | Removal Efficiency (%) <sup>a</sup> |                  |
|------------------|-------------------------------------|------------------|
|                  | Furnace <sup>b</sup>                | ESP <sup>c</sup> |
| Antimony         | 6.8                                 | 99.0             |
| Arsenic          | 1.4                                 | 97.4             |
| Barium           | 17.7                                | 99.6             |
| Beryllium        | 16.6                                | 99.3             |
| Cadmium          | 8.8                                 | 96.6             |
| Chloride         | 0.1                                 | 0.005            |
| Chromium         | 16.3                                | 99.0             |
| Cobalt           | 17.1                                | 99.4             |
| Copper           | 12.7                                | 99.1             |
| Fluoride         | 0.2                                 | 0.060            |
| Lead             | 9.4                                 | 99.3             |
| Manganese        | 21.5                                | 99.0             |
| Mercury          | 0.8                                 | 25.4             |
| Molybdenum       | 11.0                                | 98.8             |
| Nickel           | 14.4                                | 99.5             |
| Selenium         | 1.5                                 | 60.4             |
| Silver           | 16.7                                | 99.7             |
| Thallium         | 1.1                                 | 99.7             |
| Zinc             | 10.1                                | 99.5             |

<sup>a</sup>Mass of element in collected ash solids divided by total mass into device.

<sup>b</sup>Composite for all pulverized coal furnaces.

<sup>c</sup>All units with total particulate emissions rates below 0.1 lb/MBtu. Values for Ag and Th estimated based on total particulate removal efficiency.

**Table S3.** 90 Percent Probability Intervals for the Manufacture of TRI Chemicals for the Case Study Power Plant (650 MW net, 67% capacity factor) (all figures in thousand lbs/yr)

| Chemical                | 90% Range for All |        | TRI                    |
|-------------------------|-------------------|--------|------------------------|
|                         | Bituminous Coals  |        | Threshold <sup>a</sup> |
| Antimony                | 0.6               | - 8    | 21                     |
| Arsenic                 | 3                 | - 160  | 19                     |
| Barium                  | 75                | - 860  | 22                     |
| Beryllium               | 0.8               | - 7    | 9                      |
| Cadmium                 | 0.1               | - 16   | 22                     |
| Chromium                | 7                 | - 81   | 17                     |
| Cobalt                  | 3                 | - 43   | 20                     |
| Copper                  | 14                | - 136  | 22                     |
| Hydrochloric acid       | 66                | - 7000 | 24                     |
| Hydrogen fluoride       | 11                | - 360  | 24                     |
| Lead                    | 6                 | - 110  | 23                     |
| Manganese               | 18                | - 240  | 19                     |
| Mercury                 | 0.1               | - 2    | 25                     |
| Molybdenum <sup>b</sup> | 0.5               | - 37   | 17                     |
| Nickel                  | 13                | - 130  | 20                     |
| Selenium                | 2                 | - 48   | 18                     |
| Silver                  | 0.05              | - 3    | 23                     |
| Thallium                | 1                 | - 10   | 24                     |
| Zinc                    | 26                | - 250  | 20                     |

<sup>a</sup>Adjusted TRI threshold values from Table S1, rounded to nearest thousand.

<sup>b</sup>Multiply all values by 1.50 to get reportable molybdenum trioxide.

**Table S4.** Uncertainty Estimates for Total 1995 Releases from Coal-Fired Power Plants (millions of pounds) (From Ref. 21)

| <b>Substance</b>                       | <b>Air Releases</b>     |                          | <b>Total Releases</b>   |                          |
|----------------------------------------|-------------------------|--------------------------|-------------------------|--------------------------|
|                                        | <b>Base<sup>a</sup></b> | <b>Bound<sup>b</sup></b> | <b>Base<sup>a</sup></b> | <b>Bound<sup>b</sup></b> |
| HCl aerosol                            | 553                     | 1147                     | 553                     | 1147                     |
| H <sub>2</sub> SO <sub>4</sub> aerosol | 130                     | 287                      | 130                     | 287                      |
| Hydrogen fluoride                      | 55                      | 135                      | 55                      | 135                      |
| Metal compounds                        | < 2                     | 2                        | 249                     | 311                      |
| <b>Total</b>                           | <b>740</b>              | <b>1541</b>              | <b>987</b>              | <b>1880</b>              |

<sup>a</sup>Base case estimates. <sup>b</sup>Upper bound estimate.
